# Supplementary material for: Synthesis of high yield, crystalline and thermally stable rare earth (Sm, Eu, Gd) oxide square nanoplates for near-infrared light activatable photocatalysis
Source: Royal Society of Chemistry journal article supplement (doi:10.1039/d3cy00184a), 2023-01-01
Supplement: d3cy00184a1.pdf [file d3cy00184a1.pdf]

## Synthesis of High Yield, Crystalline and Thermally Stable Rare Earth (Sm, Eu, Gd) Oxide Square Nanoplates for Near-Infrared Light Activatable Photocatalysis

Sanjeevan Rajagopal<sup>#</sup>, Suresh Thangudu<sup>#</sup> and Kuo Chu Hwang<sup>\*</sup>

Department of Chemistry, National Tsing Hua University, Hsinchu 30013, Taiwan, R.O.C.

Corresponding author email: [kchwang@mx.nthu.edu.tw](mailto:kchwang@mx.nthu.edu.tw)

<sup>#</sup> Authors contributed equally.

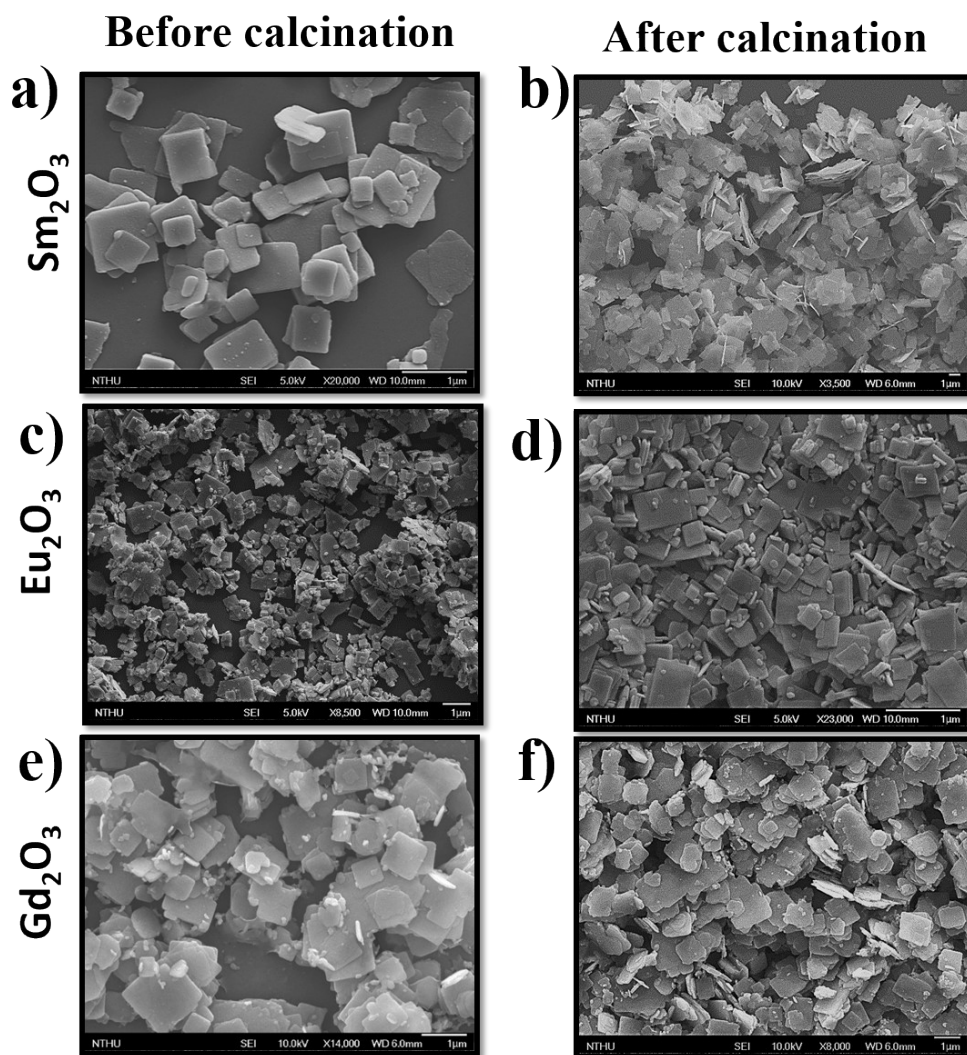

**Figure S1** . SEM analysis of REO SNPs (before and after calcination).

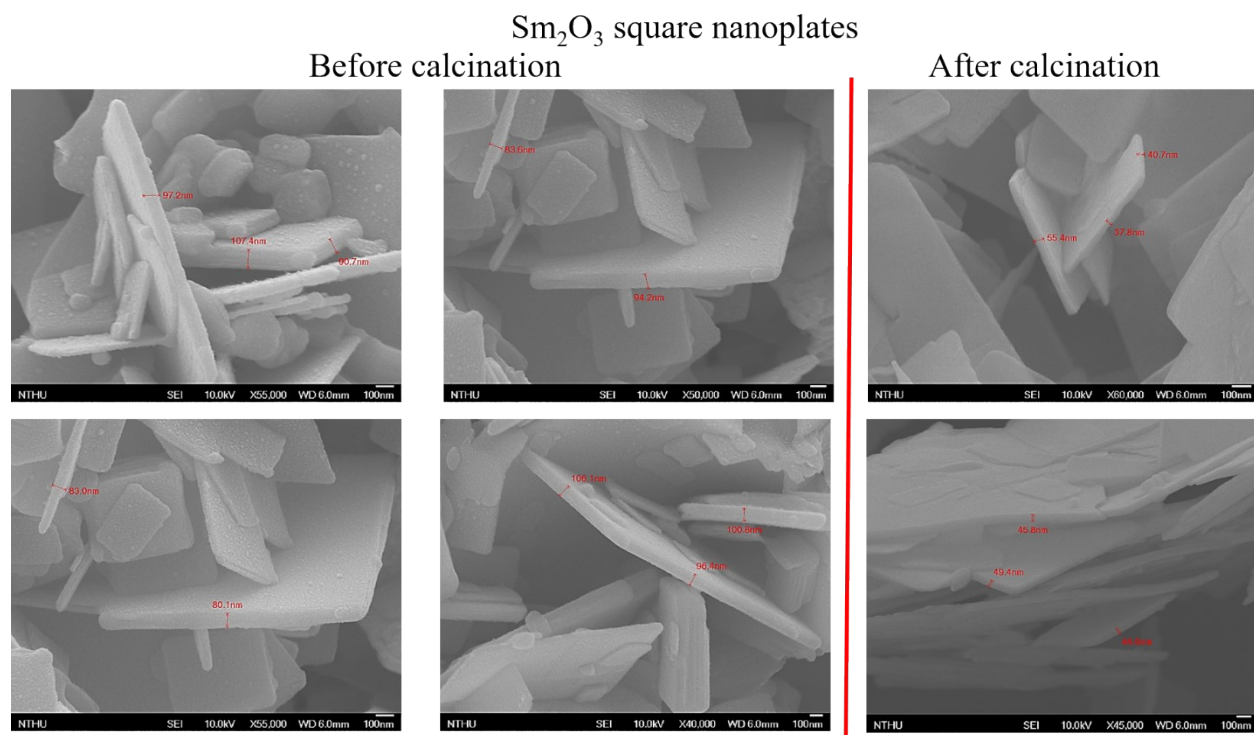

**Figure S2.** Average thickness of  $\text{Sm}_2\text{O}_3$  SNPs, before and after calcination treatment at same scale bar.

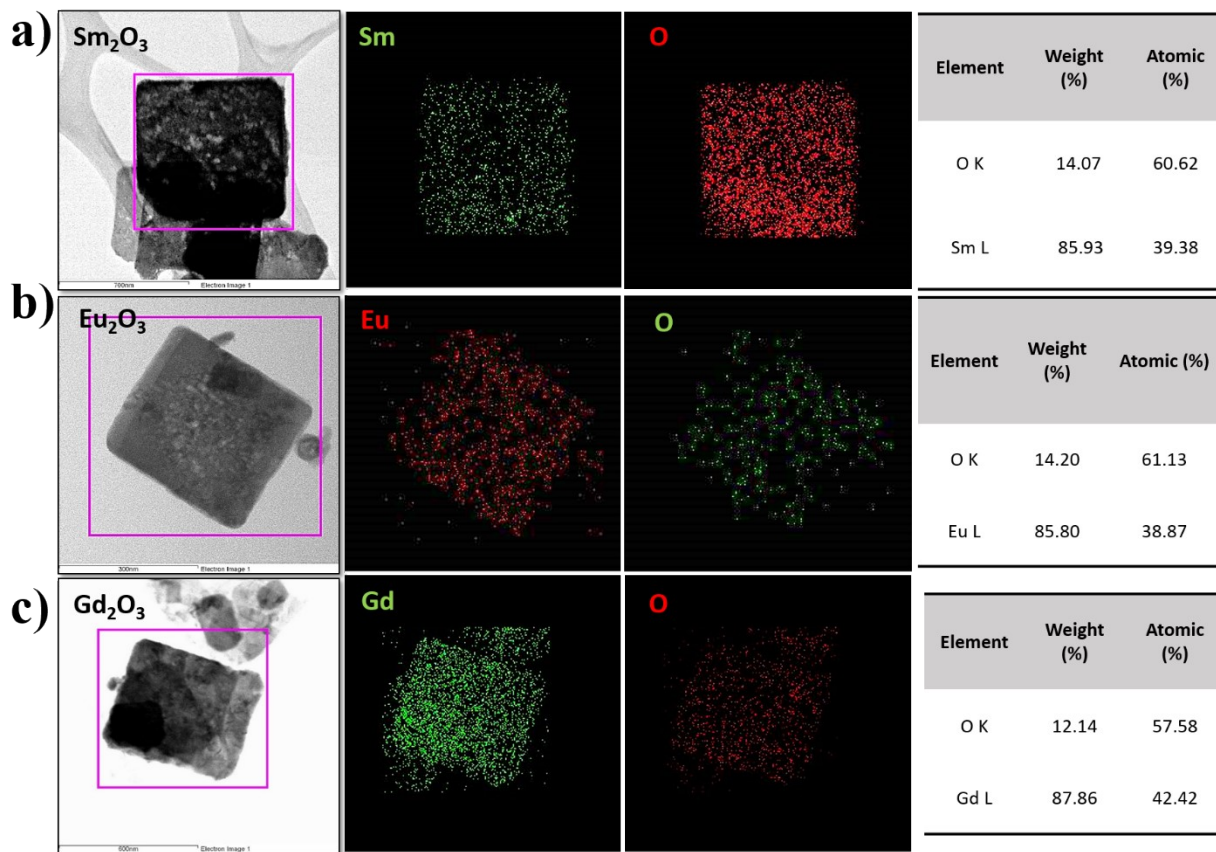

**Figure S3.** TEM-EDX analysis of calcinated REO SNPs.

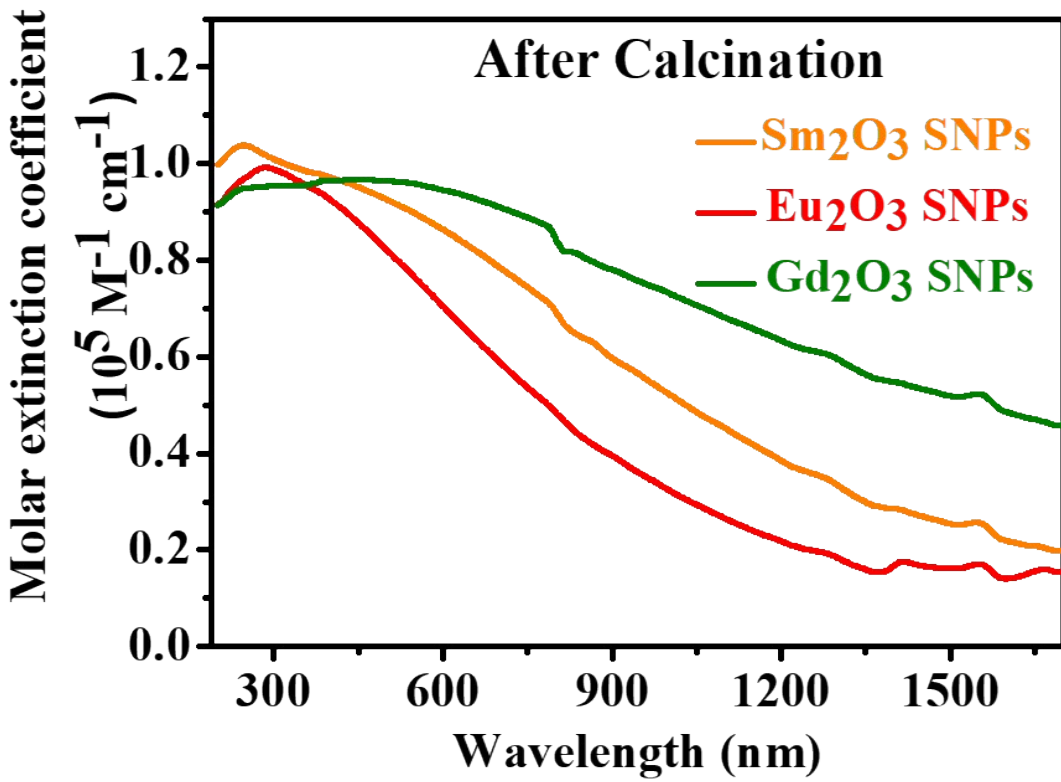

Figure S4. Molar extinction coefficient absorption spectra of REO SNP's.

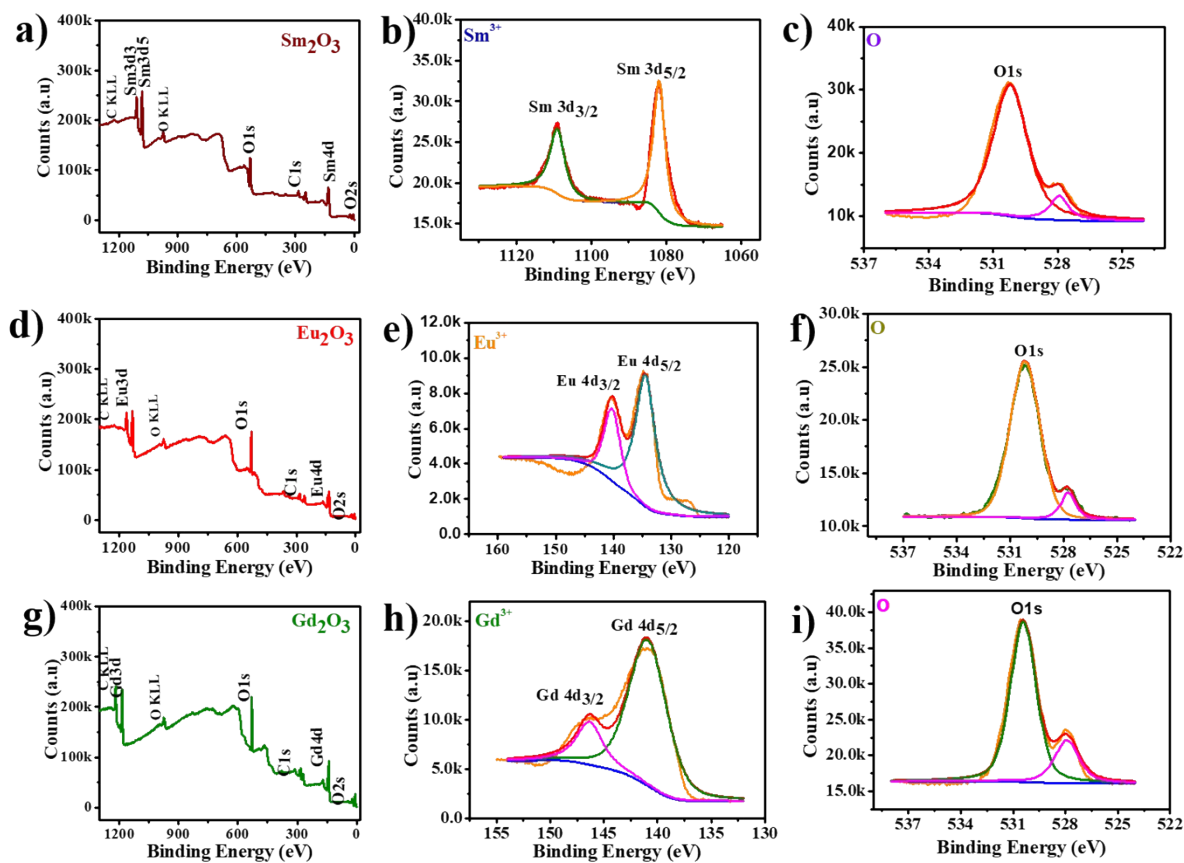

**Figure S5.** XPS analysis of calcinated REO SNPs. (a) survey scan  $\text{Sm}_2\text{O}_3$  (b) high-resolution of Sm 3d, (d) Survey scan  $\text{Eu}_2\text{O}_3$  (e) high-resolution of Eu 4d, (g) survey scan  $\text{Gd}_2\text{O}_3$  (h) high-resolution of Gd 4d, (c, f, i) high-resolution REO square nanoplates of O 1s.

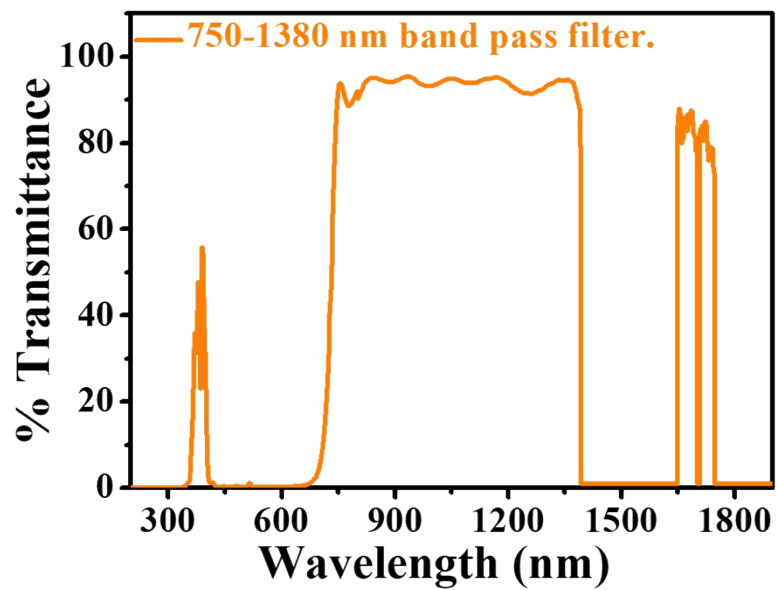

**Figure S6.** The transmittance spectrum of the output from a halogen lamp after a NIR long-pass filter (750-1380 nm filter).

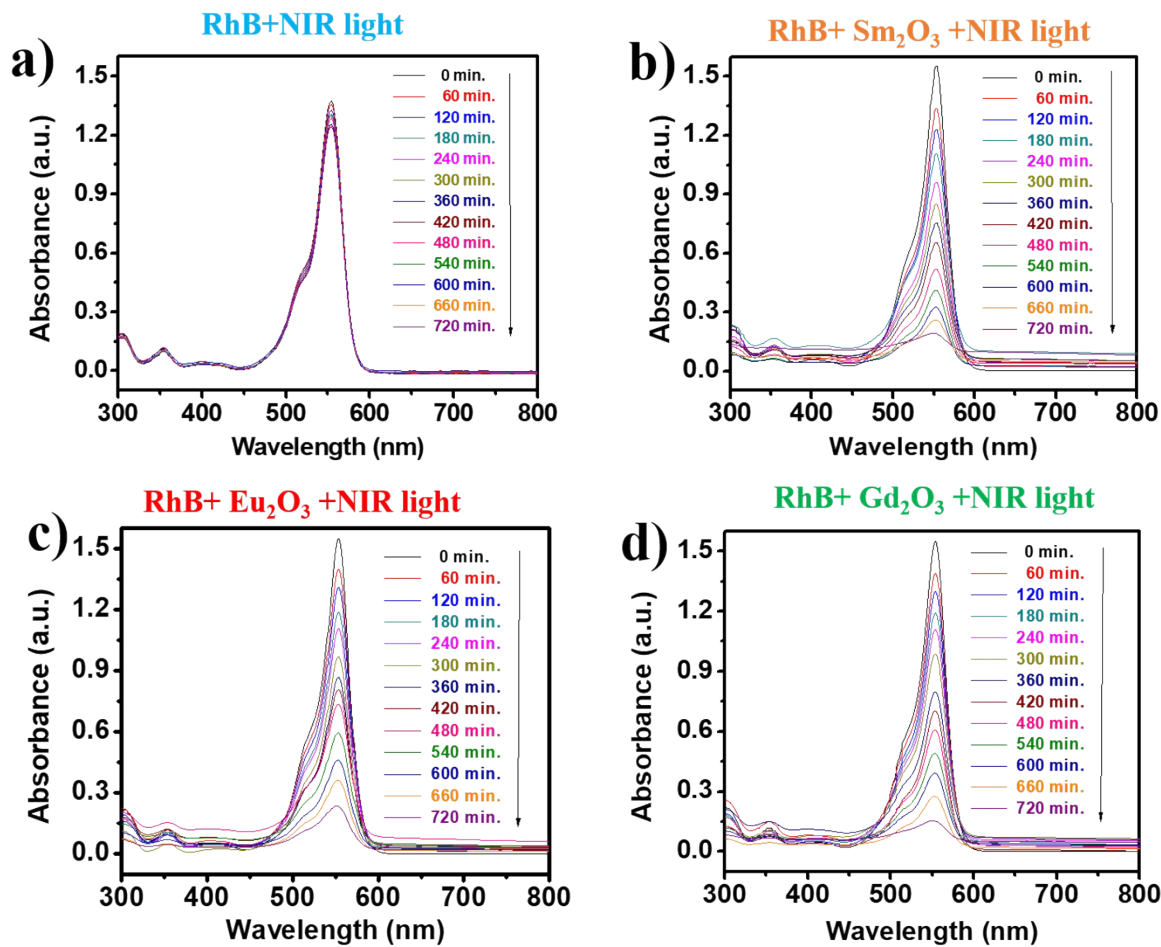

**Figure S7.** UV-Vis-NIR absorbance spectrum different time point absence and presence of a catalyst (a) without catalyst RhB with NIR light (b) with catalyst (without calcination) Sm<sub>2</sub>O<sub>3</sub> RhB, NIR light (c) with catalyst (without calcination) Eu<sub>2</sub>O<sub>3</sub> RhB, NIR light (d) with catalyst (without calcination) Gd<sub>2</sub>O<sub>3</sub> RhB, NIR light.

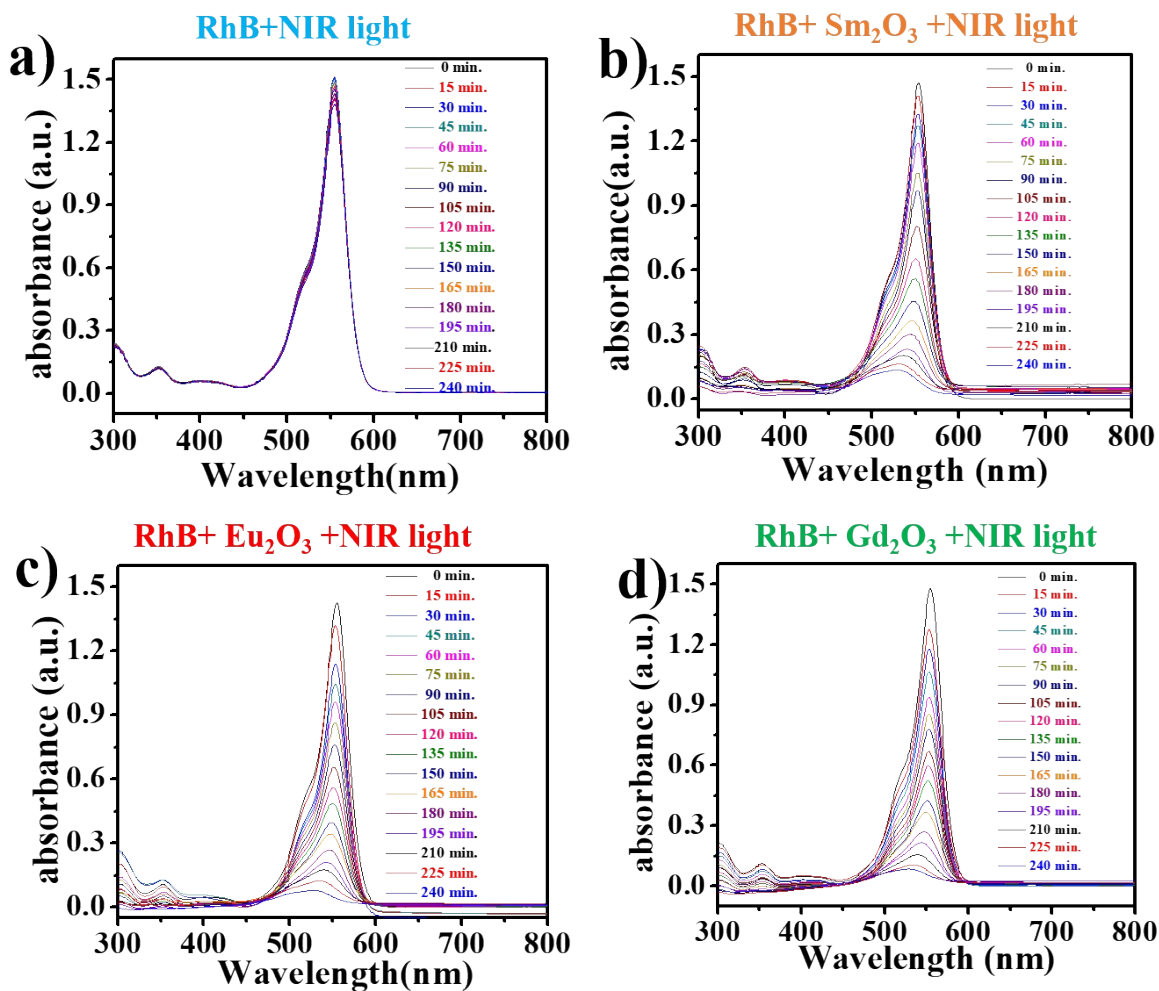

**Figure S8.** UV-Vis-NIR absorbance spectrum absence and presence of a catalyst at a different time point (0 -240 min.) (a) Without catalyst RhB with NIR light (b) with calcination catalyst  $\text{Sm}_2\text{O}_3$  RhB, NIR light (c) with calcination catalyst  $\text{Eu}_2\text{O}_3$  RhB, NIR light (d) with calcination catalyst  $\text{Gd}_2\text{O}_3$  RhB, NIR light.



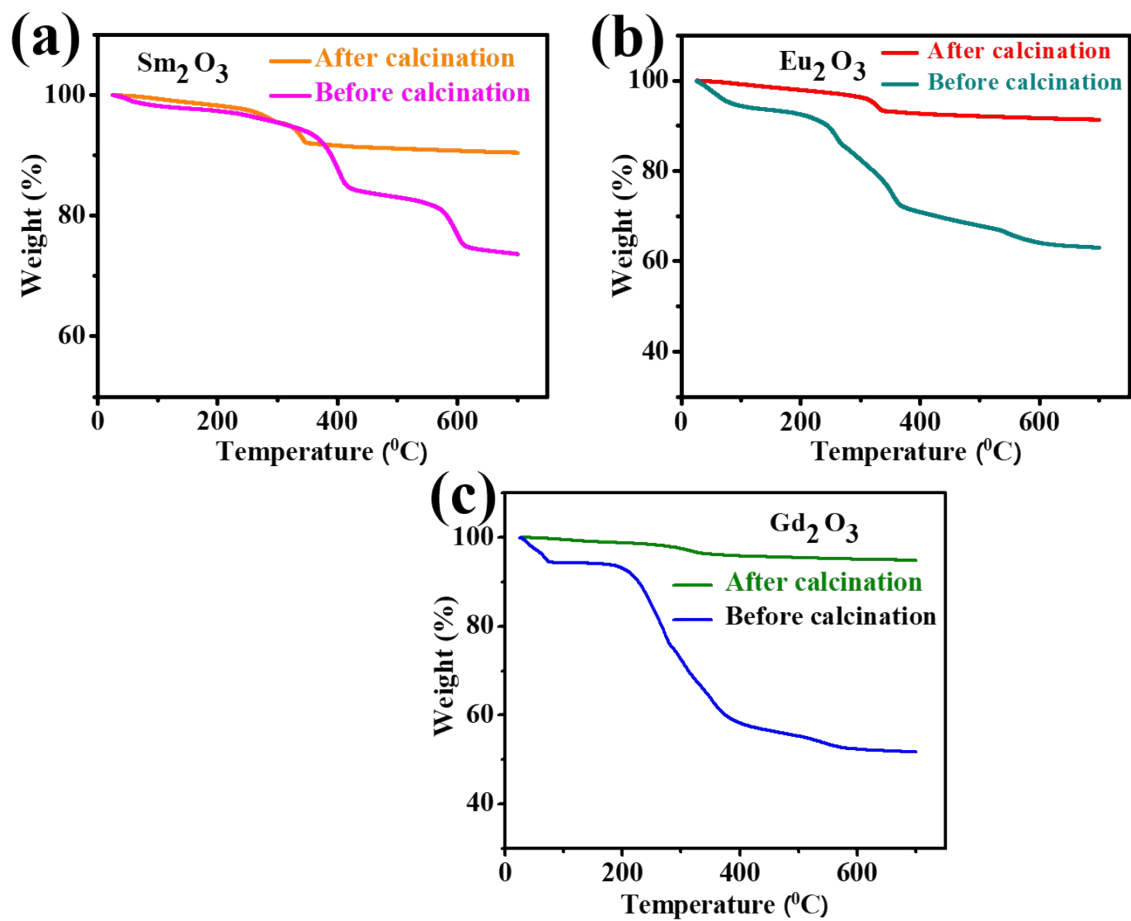

**Figure S9.** Thermogravimetric analysis of as synthesized SNPs a) Sm<sub>2</sub>O<sub>3</sub>, b) Eu<sub>2</sub>O<sub>3</sub>, c) Gd<sub>2</sub>O<sub>3</sub>. (Condition: room temperature to 750 °C with a heating rate of 10 °C/min).

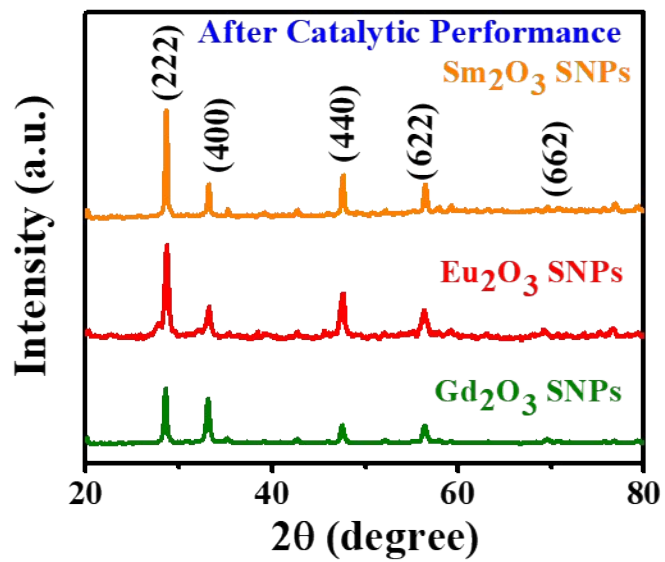

**Figure S10.** XRD analysis of REO SNPs after photocatalytic reaction.

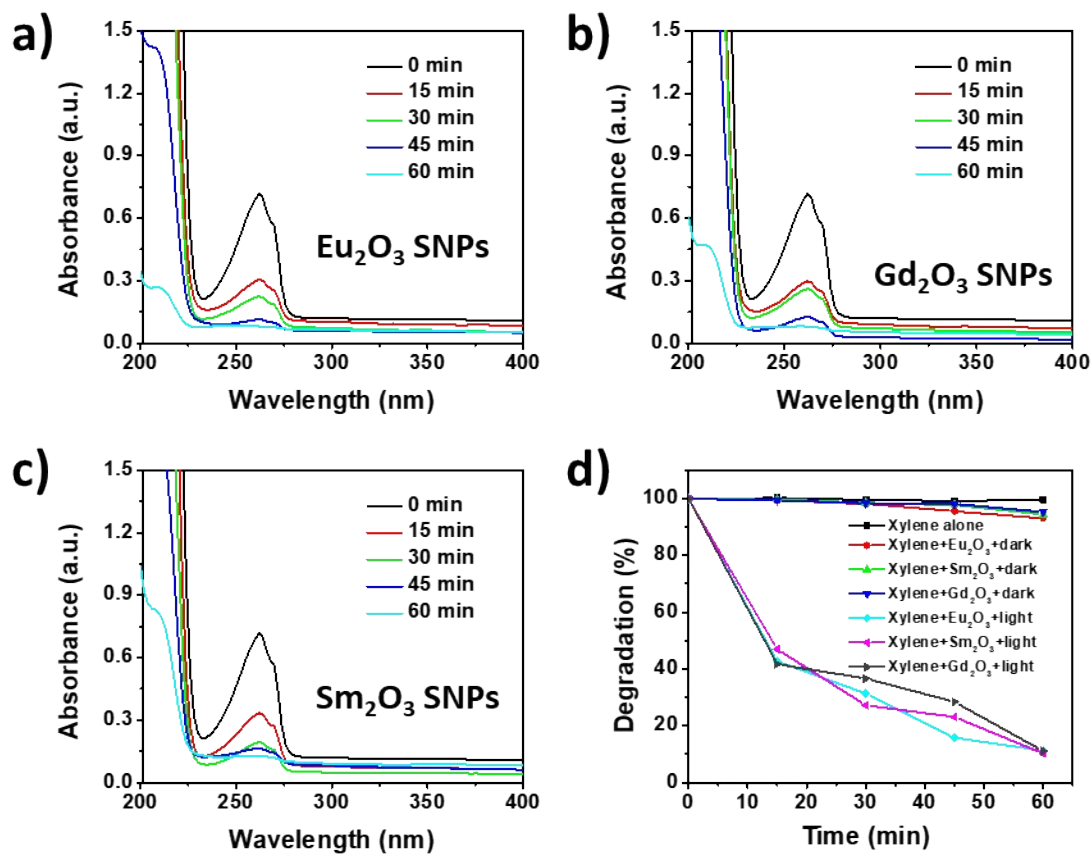

**Figure S11.** Photocatalytic degradation of o-xylene on REO SNPs (experimental condition: 1 mg/mL catalyst, 50 W halogen lamp fitted with a NIR filter)

**Table S1** Summary of recent developments on NIR light photocatalysis.

| Photocatalysis                                                                                                                           | Organic pollutant dye | Irra. time(hrs) | Laser       | Efficiency                                | Reference           |
|------------------------------------------------------------------------------------------------------------------------------------------|-----------------------|-----------------|-------------|-------------------------------------------|---------------------|
| BiWO <sub>6</sub> nanosheets                                                                                                             | Methyl orange         | 2               | 980 nm      | 75 %                                      | <b>S1</b>           |
| Cu(OH)PO <sub>4</sub> microcrystals                                                                                                      | 2,4-dichlorophenol    | 6               | λ>800 nm    | 90 %                                      | <b>S2</b>           |
| NaYF <sub>4</sub> :Yb, Tm@TiO <sub>2</sub> core-shell NPs                                                                                | Methyl blue           | 14              | 980 nm      | 65 %                                      | <b>S3</b>           |
| BiVO <sub>4</sub> /CaF <sub>2</sub> :Er <sup>3+</sup> , Tm <sup>3+</sup> , Yb <sup>3+</sup> NPs.                                         | Methyl orange         | 6               | 980 nm      | 40 %                                      | <b>S4</b>           |
| Ag <sub>2</sub> S/Ag <sub>3</sub> PO <sub>4</sub> core/shell                                                                             | Methyl orange         | 2               | 760 nm      | 90 %                                      | <b>S5</b>           |
| YF <sub>3</sub> :Yb,Tm/TiO <sub>2</sub>                                                                                                  | Methyl blue           | 30              | 980 nm      | 70%                                       | <b>S6</b>           |
| CaF <sub>2</sub> :Yb@BiVO <sub>4</sub>                                                                                                   | Methyl orange         | 7               | 980 nm      | 70%                                       | <b>S7</b>           |
| MoO <sub>3</sub> nanobelts                                                                                                               | Rhodamine B           | 2               | 800–1600 nm | 70 %                                      | <b>S8</b>           |
| β-NaYF <sub>4</sub> :Yb/Er-N-TiO <sub>2</sub>                                                                                            | Rhodamine B           | 36              | 980 nm      | 80%                                       | <b>S9</b>           |
| Rare Earth Oxides Sm <sub>2</sub> O <sub>3</sub> , Eu <sub>2</sub> O <sub>3</sub> , and Gd <sub>2</sub> O <sub>3</sub> square nanoplates | Rhodamine B           | 6               | 750–1350 nm | <b>92 %</b><br><b>95 %</b><br><b>96 %</b> | <b>Present work</b> |

**Supplementary References**

**S1.** J. Tian, Y. Sang, G. Yu, H. Jiang, X. Mu and H. Liu, *Adv. Mater.*, 2013, **25**, 5075–5080.

**S2.** G. Wang, B. Huang, X. Ma, Z. Wang, X. Qin, X. Zhang, Y. Dai and M. H. Whangbo, *Angew. Chem., Int. Ed.*, 2013, **52**, 4810–4813

- S3.** Y. Tang, W. Di, X. Zhai, R. Yang and W. Qin, *ACS Catal.*, 2013, **3**, 405– 412.
- S4.** S. Huang, N. Zhu, Z. Lou, L. Gu, C. Miao, H. Yuan and A. Shan, *Nanoscale*, 2014, **6**, 1362-1368.
- S5.** J. Tian, T. Yan, Z. Qiao, L. Wang, W. Li, J. You and B. Huang, *Appl. Catal., B*, 2017, **209**, 566–578.
- S6.** W. Qin, D. Zhang, D. Zhao, L. Wang and K. Zheng, *Chem. Commun.*, 2010, **46**, 2304–2306.
- S7.** X. Liu, W. Di and W. Qin, *Appl. Catal., B*, 2017, **205**, 158–164.
- S8.** C. Hu, M. Xu, J. Zhang, Y. Zhou, B. Hu, and G. Yu, *International Journal of Chemical Kinetics*, 2019, **51**, 3-13.
- S9.** Y. Ma, W. Yue, Z. Xu, Z. Ye, and J. Zhang, *Catalysis Today*, 2023, **410**, 13-18.
